# Supplementary material
Source: PubMed Central journal article supplement (PMC9380217)
Supplement: pt2c00088_si_001.pdf [file pt2c00088_si_001.pdf]

## Supporting Information

Validating the arrhythmogenic potential of high, intermediate, and low risk drugs in a human induced pluripotent stem cell (hiPSC)-derived cardiac microphysiological system

*Verena Charwat<sup>1‡</sup>, Bérénice Charrez<sup>1‡</sup>, Brian A. Siemons<sup>1</sup>, Henrik Finsberg<sup>2</sup>, Karoline H. Jæger<sup>2</sup>, Andrew G. Edwards<sup>2</sup>, Nathaniel Huebsch<sup>1</sup>, Samuel Wall<sup>2</sup>, Evan Miller<sup>3</sup>, Aslak Tveito<sup>2</sup>, Kevin E. Healy<sup>1,4\*</sup>*

1. Department of Bioengineering and California Institute for Quantitative Biosciences (QB3), University of California at Berkeley, Berkeley, California 94720, USA

2. Simula Research Laboratory, 0164 Oslo, Norway

3. Department of Chemistry, University of California at Berkeley, Berkeley, California 94720, USA

4. Department of Materials Science and Engineering, University of California at Berkeley, Berkeley, California 94720, USA

‡ These authors contributed equally.

\* corresponding author: kehealy@berkeley.edu

## Table of Contents

|                                       |            |
|---------------------------------------|------------|
| Supplementary Tables                  | pages 3-6  |
| Supplementary Table S1                | page 3     |
| Supplementary Table S2                | page 3     |
| Supplementary Table S3                | page 4     |
| Supplementary Table S4                | page 4     |
| Supplementary Table S5                | page 4     |
| Supplementary Table S6                | page 5     |
| Supplementary Table S7                | page 6     |
| <br>                                  |            |
| Supplementary Figures                 | pages 7-11 |
| Supplementary Figure S8               | page 7     |
| Supplementary Figure S9               | page 8     |
| Supplementary Figure S10              | page 9     |
| Supplementary Figure S11              | page 10    |
| Supplementary Figure S12`             | page 11    |
| <br>                                  |            |
| References for supporting information | page 12    |

**Supplementary Table S1:** Differences in ion channel activity and other elements of the cellular electrophysiological machinery in WTC vs SCVI20 determined by mathematical modeling.<sup>1</sup> (n.s. not significant, \*  $p < 0.05$ , \*\*\*\*  $p < 0.0001$ )

| Parameter                       | Current         | Cell line with higher activity | Significance level |
|---------------------------------|-----------------|--------------------------------|--------------------|
| potassium current               | $I_{Kr}$ (hERG) | WTC                            | *                  |
| potassium current               | $I_{K1}$        | very similar                   | n.s.               |
| sodium current                  | $I_{Na}$        | very similar                   | n.s.               |
| calcium current                 | $I_{Ca}$        | very similar                   | n.s.               |
| Sodium-calcium exchange current | $I_{NaCaX}$     | SCVI20                         | n.s.               |
| calcium buffer                  |                 | WTC                            | ****               |
| Ryanodine-receptor flux (RyR)   |                 | very similar                   | n.s.               |
| Intracellular calcium diffusion |                 | very similar                   | n.s.               |
| SERCA pump activity             |                 | WTC                            | *                  |

**Supplementary Table S2:** Inter- and intra-batch variation of key electrophysiological parameters in WTC and SCVI20 cell line. A batch refers to a set of tissues loaded at the same time. Different batches were loaded from independent differentiations.

|                    | WTC                    |                          | SCVI20                 |                          |
|--------------------|------------------------|--------------------------|------------------------|--------------------------|
|                    | variation within batch | batch-to-batch variation | variation within batch | batch-to-batch variation |
| beat rate          | 22%                    | 28%                      | 27%                    | 15%                      |
| cAPD <sub>80</sub> | 16%                    | 19%                      | 17%                    | 19%                      |
| triangulation      | 17%                    | 23%                      | 22%                    | 9%                       |

**Supplementary Table S3: Drug properties.**

| Drug name   | Formulation              | CAS-Nr      | Company           | Product Nr. | MW (g/mol) | TdP risk     |
|-------------|--------------------------|-------------|-------------------|-------------|------------|--------------|
| Dofetilide  | Dofetilide               | 115256-11-6 | ApexBio           | A8417       | 441.56     | high         |
| Bepidil     | Bepidil hydrochloride    | 74764-40-2  | Sigma-Aldrich     | B5016       | 403        | high         |
| Amiodarone  | Amiodarone hydrochloride | 19774-82-4  | Spectrum Chemical | A3972       | 681.78     | intermediate |
| Terfenadine | Terfenadine              | 50679-08-8  | Sigma-Aldrich     | T9652       | 471.67     | intermediate |
| Nifedipine  | Nifedipine               | 21829-25-4  | Sigma-Aldrich     | N7634       | 246.34     | low          |
| Mexiletine  | Mexiletine hydrochloride | 1/4/70      | TCI               | M2040       | 215.72     | low          |
| Lidocaine   | Lidocaine                | 137-58-6    | TCI               | L0156       | 234.34     | low          |

**Supplementary Table S4: Drug dose preparation.**

| Drug        | Cmax (μM)            | stock (mM) | solvent | final solvent conc | Stock storage    | Dose unit   | Dose 1         | Dose 2       | Dose 3      | Dose 4       | Dose 5      |
|-------------|----------------------|------------|---------|--------------------|------------------|-------------|----------------|--------------|-------------|--------------|-------------|
| Dofetilide  | 0.002 <sup>6</sup>   | 10         | DMSO    | 0.1%               | -20°C few months | μM<br>xCmax | 0.0001<br>0.05 | 0.001<br>0.5 | 0.01<br>5   | 0.1<br>50    | 1<br>500    |
| Bepidil     | 0.032 <sup>6</sup>   | 32         | DMSO    | 0.1%               | fresh            | μM<br>xCmax | 0.0032<br>0.1  | 0.032<br>1   | 0.32<br>10  | 3.2<br>100   | 32<br>1,000 |
| Amiodarone  | 0.0008 <sup>5</sup>  | 10         | DMSO    | 0.1%               | fresh            | μM<br>xCmax | 0.001<br>1.25  | 0.01<br>12.5 | 0.1<br>125  | 1<br>1250    |             |
| Terfenadine | 0.00028 <sup>6</sup> | 3          | Ethanol | 0.1%               | fresh            | μM<br>xCmax | 0.0003<br>1    | 0.003<br>10  | 0.03<br>100 | 0.3<br>1,000 | 3<br>10,000 |
| Nifedipine  | 0.0077 <sup>6</sup>  | 20         | DMSO    | 0.05%              | fresh            | μM<br>xCmax | 0.001<br>0.125 | 0.01<br>1.25 | 0.1<br>12.5 | 1<br>125     | 10<br>1250  |
| Mexiletine  | 2.5 <sup>6</sup>     | 50         | media   | n.a.               | fresh            | μM<br>xCmax | 1<br>0.4       | 10<br>4      | 100<br>40   | 1,000<br>400 |             |
| Lidocaine   | 2.5 <sup>5</sup>     | 15         | media   | n.a.               | fresh            | μM<br>xCmax | 1<br>0.4       | 10<br>4      | 100<br>40   | 1,000<br>400 |             |

**Supplementary Table S5: Ion channel targets.**

| Drug                                 | Dofetilide      | Bepidil                                               | Amiodarone       | Terfenadine                                           | Nifedipine       | Mexiletine                                           | Lidocaine        |
|--------------------------------------|-----------------|-------------------------------------------------------|------------------|-------------------------------------------------------|------------------|------------------------------------------------------|------------------|
| <i>main target</i>                   | I <sub>Kr</sub> | I <sub>Kr</sub>                                       | I <sub>Kr</sub>  | I <sub>Kr</sub>                                       | I <sub>CaL</sub> | I <sub>NaL</sub>                                     | I <sub>NaL</sub> |
| <i>&gt;50% block at highest dose</i> |                 | I <sub>CaL</sub> , I <sub>NaL</sub> , I <sub>Na</sub> |                  | I <sub>CaL</sub> , I <sub>NaL</sub> , I <sub>Na</sub> |                  | I <sub>Kr</sub> , I <sub>CaL</sub> , I <sub>Na</sub> |                  |
| <i>15-50% block at highest dose</i>  |                 |                                                       | I <sub>CaL</sub> |                                                       |                  |                                                      |                  |

**Supplementary Table S6:** Block percentages for drug doses based on drug characteristics from literature.<sup>2-4</sup>

| Drug                      | Dose      | Block I <sub>Kr</sub><br>(%) | Block I <sub>CaL</sub><br>(%) | Block I <sub>Na</sub><br>(%) | Block I <sub>NaL</sub><br>(%) |
|---------------------------|-----------|------------------------------|-------------------------------|------------------------------|-------------------------------|
| Dofetilide <sup>2</sup>   | 0.1 nM    | 0.1                          | 0                             | 0                            | 0                             |
|                           | 1 nM      | 1.7                          | 0                             | 0                            | 0                             |
|                           | 10 nM     | 21                           | 0                             | 0                            | 0                             |
|                           | 100 nM    | 80.5                         | 0.2                           | 0                            | 0                             |
|                           | 1000 nM   | 98                           | 2                             | 0.1                          | 0.1                           |
| Bepridil <sup>2</sup>     | 0.0032 μM | 2.7                          | 0.1                           | 0                            | 0                             |
|                           | 0.032 μM  | 16.9                         | 1.2                           | 0.5                          | 0.5                           |
|                           | 0.32 μM   | 56                           | 18.1                          | 7.7                          | 7.7                           |
|                           | 3.2 μM    | 80.6                         | 78.1                          | 60.3                         | 60.3                          |
|                           | 32 μM     | 85.6                         | 94.6                          | 96.5                         | 96.5                          |
| Amiodarone <sup>2</sup>   | 1 nM      | 0.1                          | 0.3                           | 0                            | 0                             |
|                           | 10 nM     | 0.6                          | 1.5                           | 0.1                          | 0.1                           |
|                           | 100 nM    | 7.2                          | 6.6                           | 0.6                          | 0.6                           |
|                           | 1000 nM   | 44.3                         | 22.4                          | 5.5                          | 5.5                           |
| Terfenadine <sup>2</sup>  | 0.3 nM    | 0.2                          | 0                             | 0                            | 0                             |
|                           | 3 nM      | 3.2                          | 0                             | 0                            | 0                             |
|                           | 30 nM     | 30.2                         | 0.2                           | 0                            | 0                             |
|                           | 300 nM    | 75                           | 11.3                          | 3.1                          | 3.1                           |
|                           | 3000 nM   | 83.8                         | 87.4                          | 66.9                         | 66.9                          |
| Nifedipine <sup>2</sup>   | 0.003 μM  | 0                            | 17.3                          | 0                            | 0                             |
|                           | 0.03 μM   | 0.2                          | 63.4                          | 0.2                          | 0.2                           |
|                           | 0.3 μM    | 1.2                          | 85.1                          | 0.9                          | 0.9                           |
|                           | 3 μM      | 6.9                          | 88                            | 4.5                          | 4.5                           |
| Mexiletine <sup>2,3</sup> | 1 μM      | 2                            | 1                             | 2.3                          | 4.4                           |
|                           | 10 μM     | 16.7                         | 9.1                           | 18.9                         | 53.8                          |
|                           | 100 μM    | 66.7                         | 50                            | 69.9                         | 96.7                          |
|                           | 1000 μM   | 95.2                         | 90.9                          | 95.8                         | 99.9                          |
| Lidocaine <sup>4</sup>    | 1 μM      | 0                            | 0                             | 0                            | 4.3                           |
|                           | 10 μM     | 0                            | 0                             | 0                            | 47.5                          |
|                           | 100 μM    | 0                            | 0                             | 0                            | 94.7                          |
|                           | 1000 μM   | 0                            | 0                             | 0                            | 99.7                          |

**Supplementary Table S7:** IC50 values reported in different studies.

| Drug        | I <sub>Kr</sub>            | IC50                   |                         |
|-------------|----------------------------|------------------------|-------------------------|
|             |                            | I <sub>CaL</sub>       | I <sub>Na</sub>         |
| Dofetilide  | 1 nM <sup>2</sup>          | 26,700 nM <sup>4</sup> | 162,100 nM <sup>4</sup> |
|             | 5 nM <sup>3</sup>          | 60,000 nM <sup>3</sup> | 300,000 nM <sup>3</sup> |
|             | 7.3-13 nM <sup>5</sup>     |                        |                         |
|             | 30 nM <sup>4</sup>         |                        |                         |
|             | 70 nM <sup>6</sup>         |                        |                         |
| Bepridil    | 0.033 μM <sup>3</sup>      | 0.211 μM <sup>3</sup>  | 2.3 μM <sup>4</sup>     |
|             | 0.149 μM <sup>2</sup>      | 1.0 μM <sup>4</sup>    | 2.929 μM <sup>2</sup>   |
|             | 0.16 μM <sup>4</sup>       | 2.808 μM <sup>2</sup>  | 3.7 μM <sup>3</sup>     |
| Amiodarone  | 30 nM <sup>3</sup>         | 270 nM <sup>3</sup>    | 4,577 nM <sup>2</sup>   |
|             | 860 nM <sup>4</sup>        | 1,281 nM <sup>2</sup>  | 4,800 μM <sup>3</sup>   |
|             | 940 nM <sup>2</sup>        | 1,900 nM <sup>4</sup>  | 15,900 μM <sup>4</sup>  |
| Terfenadine | 8.9 nM <sup>3</sup>        | 375 nM <sup>3</sup>    | 950 nM <sup>6</sup>     |
|             | 10-18 nM <sup>7</sup>      | 700 nM <sup>2</sup>    | 971 nM <sup>3</sup>     |
|             | 19 nM <sup>2</sup>         | 930 nM <sup>4</sup>    | 2,000 nM <sup>4</sup>   |
|             | 38 nM <sup>6</sup>         |                        |                         |
|             | 50 nM <sup>4</sup>         |                        |                         |
|             | 54.3-165.4 nM <sup>5</sup> |                        |                         |
| Nifedipine  | 44,000 nM <sup>4</sup>     | 12 nM <sup>4</sup>     | 37,000 nM <sup>3</sup>  |
|             | 275,000 nM <sup>3</sup>    | 38 nM <sup>8</sup>     | 88,300 nM <sup>4</sup>  |
|             |                            | 39 nM <sup>9</sup>     |                         |
|             |                            | 60 nM <sup>3</sup>     |                         |
| Mexiletine  | 21.4 μM <sup>6</sup>       | 100 μM <sup>3</sup>    | 7.6 μM <sup>6</sup>     |
|             | 50 μM <sup>3</sup>         |                        | 43 μM <sup>3</sup>      |

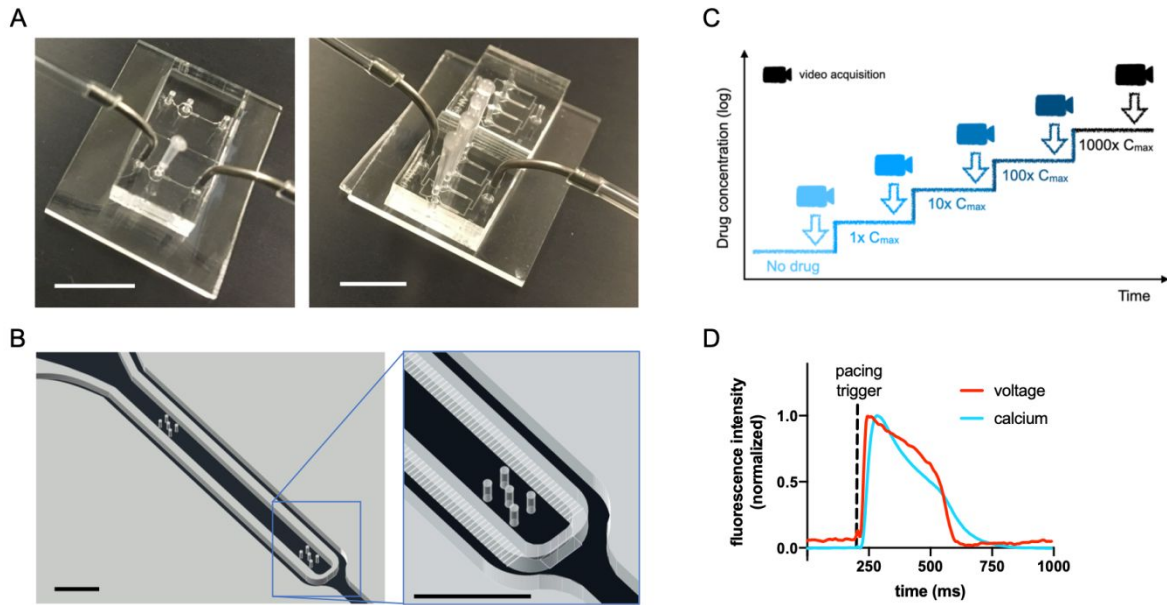

**Supplementary Figure S8: Cardiac MPS and experimental plan.** **A)** Photographs of the microfluidic devices show the cardiac MPS with a single tissue chamber (left image) and multiplexed MPS with 4 parallel tissue chambers (right image). Two independent microfluidic systems are bonded to each glass slide. The multiplexed cardiac MPS has plugged cell loading inlets and tubing for media perfusion linked to metal connectors that also serve as pacing electrodes (left image). Scale bars represent approximately 1cm. **B)** AutoCAD rendering of the cardiac MPS showing a cell chamber with 2 sets of anchor pillars (left) and at higher magnification (right) highlighting chamber details such as fenestration that connect the cell chamber to the media channels and weir for cell loading. Scale bars represent 200 $\mu$ m. **C)** Schematic plan of a dose escalation drug study. The same MPS was sequentially exposed to increasing doses of a drug. Initially, no drug was applied, then the first drug dose (range: 0.05-fold to 1.25-fold  $C_{max}$ ) was perfused followed by 10-fold dose increments. Each dose was incubated for 30min. At the end of the incubation period videos were acquired to record changes in beat waveforms. **D)** Intensity traces were obtained from voltage (red; BeRST-1 dye) and calcium (cyan; GCaMP or OGB-1-AM dye) fluorescence videos. For externally paced samples, the pacing trigger pulse was used to align voltage and calcium traces.

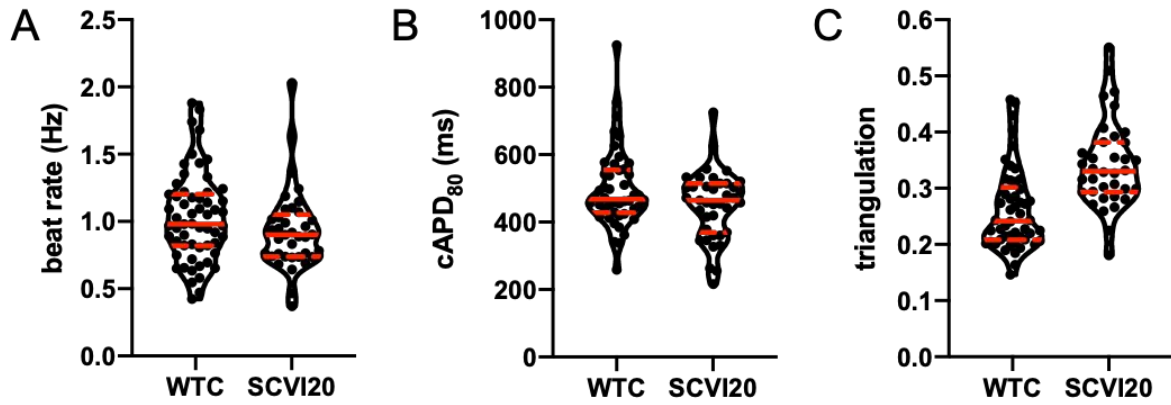

**Supplementary Figure S9: Baseline characterization of WTC and SCVI20 MPS.** Violin scatter plots of **A**) spontaneous beat rates (WTC  $1.03 \pm 0.33$  Hz; SCVI20  $0.93 \pm 0.30$  Hz), **B**) action potential duration  $APD_{80}$  at 1Hz or beat rate corrected to 1Hz (WTC  $497 \pm 117$  ms; SCVI20  $451 \pm 101$  ms), **C**) triangulation calculated as  $(APD_{80} - APD_{30})/APD_{80}$  (WTC  $0.262 \pm 0.072$ ; SCVI20  $0.342 \pm 0.077$ ). Median and quartiles are indicated in red.



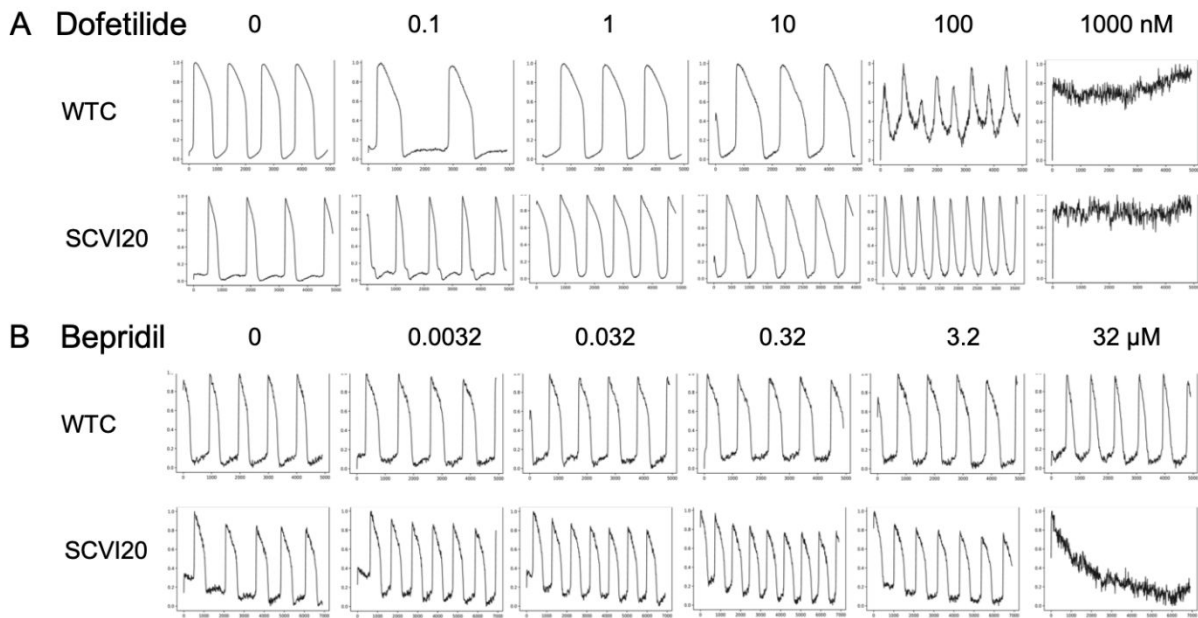

**Supplementary Figure S10: Representative voltage traces for high-risk drugs.** Voltage traces from MPS exposed to increasing doses of Dofetilide (**A**) or Bepridil (**B**). Representative traces are shown for a WTC tissue (top row) and a SCVI20 tissue (bottom row) after background subtraction and normalization to the intensity range 0 to 1.

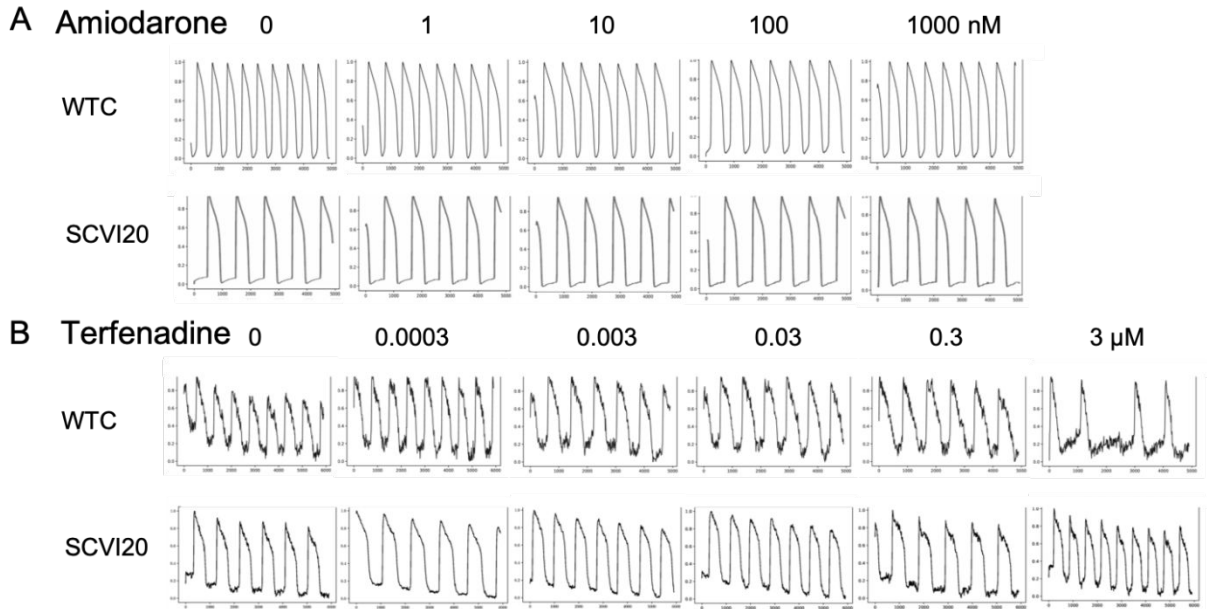

**Supplementary Figure S11: Representative voltage traces for intermediate-risk drugs.** Voltage traces from MPS exposed to increasing doses of Amiodarone (**A**) or Terfenadine (**B**). Representative traces are shown for a WTC tissue (top row) and a SCVI20 tissue (bottom row) after background subtraction and normalization to the intensity range 0 to 1.

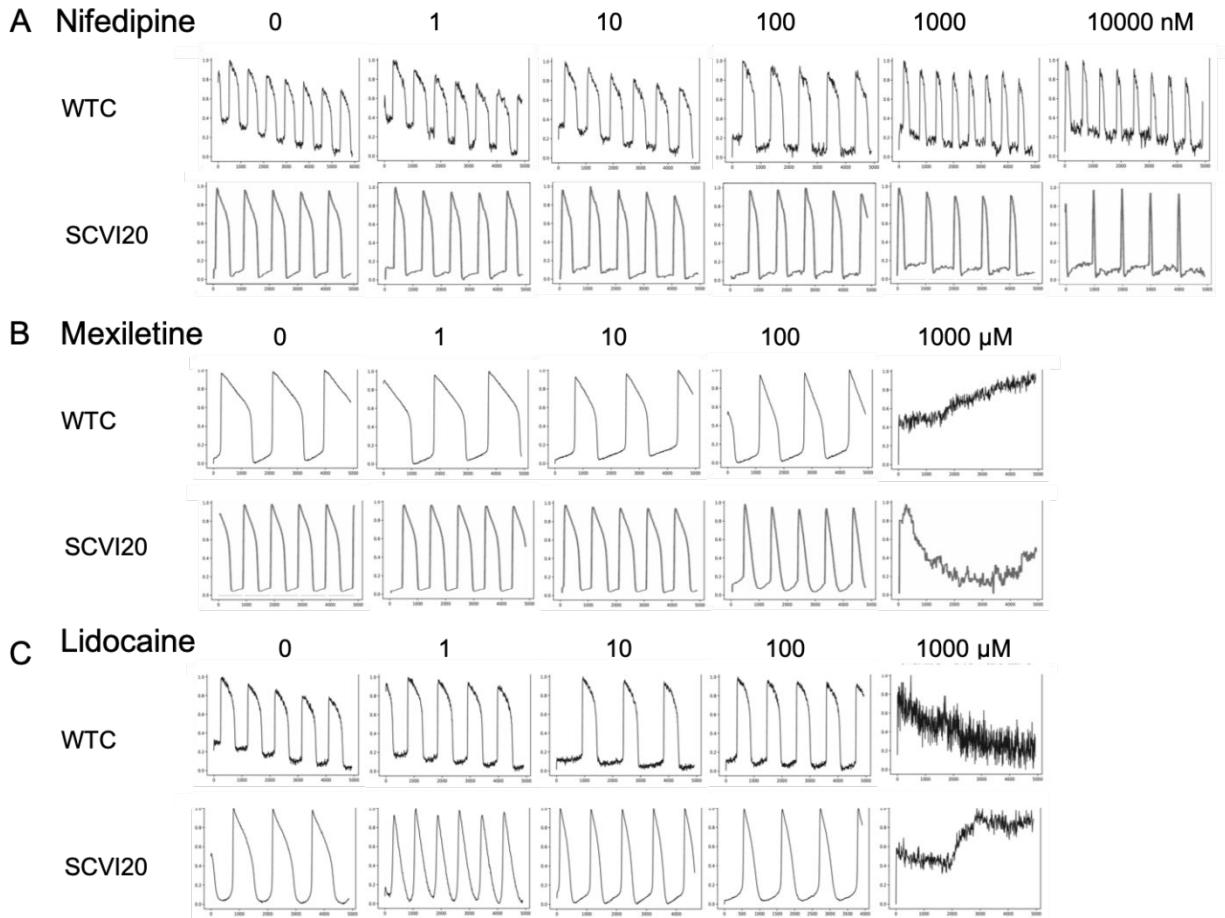

**Supplementary Figure S12: Representative voltage traces for low-risk drugs.** Voltage traces from MPS exposed to increasing doses of Nifedipine (**A**), Mexiletine (**B**) or Lidocaine (**C**). Representative traces are shown for a WTC tissue (top row) and a SCVI20 tissue (bottom row) after background subtraction and normalization to the intensity range 0 to 1.

## References

- (1) Huebsch, N.; Charrez, B.; Neiman, G.; Siemons, B.; Boggess, S. C.; Wall, S.; Charwat, V.; Jæger, K. H.; Cleres, D.; Telle, Á.; et al. Metabolically driven maturation of human-induced-pluripotent-stem-cell-derived cardiac microtissues on microfluidic chips. *Nat Biomed Eng* **2022**, *6* (4), 372-388. DOI: 10.1038/s41551-022-00884-4.
- (2) Crumb, W. J.; Vicente, J.; Johannesen, L.; Strauss, D. G. An evaluation of 30 clinical drugs against the comprehensive in vitro proarrhythmia assay (CiPA) proposed ion channel panel. *J Pharmacol Toxicol Methods* **2016**, *81*, 251-262. DOI: 10.1016/j.vascn.2016.03.009.
- (3) Mirams, G. R.; Cui, Y.; Sher, A.; Fink, M.; Cooper, J.; Heath, B. M.; McMahon, N. C.; Gavaghan, D. J.; Noble, D. Simulation of multiple ion channel block provides improved early prediction of compounds' clinical torsadogenic risk. *Cardiovasc Res* **2011**, *91* (1), 53-61. DOI: 10.1093/cvr/cvr044.
- (4) Kramer, J.; Obejero-Paz, C. A.; Myatt, G.; Kuryshev, Y. A.; Bruening-Wright, A.; Verducci, J. S.; Brown, A. M. MICE models: superior to the HERG model in predicting Torsade de Pointes. *Sci Rep* **2013**, *3*, 2100. DOI: 10.1038/srep02100.
- (5) Orvos, P.; Kohajda, Z.; Szlovák, J.; Gazdag, P.; Árpádfy-Lovas, T.; Tóth, D.; Geramipour, A.; Tálósi, L.; Jost, N.; Varró, A.; et al. Evaluation of Possible Proarrhythmic Potency: Comparison of the Effect of Dofetilide, Cisapride, Sotalol, Terfenadine, and Verapamil on hERG and Native IKr Currents and on Cardiac Action Potential. *Toxicol Sci* **2019**, *168* (2), 365-380. DOI: 10.1093/toxsci/kfy299.
- (6) Qu, Y.; Vargas, H. M. Proarrhythmia Risk Assessment in Human Induced Pluripotent Stem Cell-Derived Cardiomyocytes Using the Maestro MEA Platform. *Toxicol Sci* **2015**, *147* (1), 286-295. DOI: 10.1093/toxsci/kfv128.
- (7) Katayama, Y.; Tsuzaki, T.; Abe, K.; Tomizawa, S.; Izumi, T.; Tsurubuchi, Y. The inter-cell-line reproducibility of hERG assay using the whole-cell patch-clamping. *J. Pharmacol. Sci.* **2005**, *97*.
- (8) Ma, J.; Guo, L.; Fiene, S. J.; Anson, B. D.; Thomson, J. A.; Kamp, T. J.; Kolaja, K. L.; Swanson, B. J.; January, C. T. High purity human-induced pluripotent stem cell-derived cardiomyocytes: electrophysiological properties of action potentials and ionic currents. *Am J Physiol Heart Circ Physiol* **2011**, *301* (5), H2006-2017. DOI: 10.1152/ajpheart.00694.2011.
- (9) Gibson, J. K.; Yue, Y.; Bronson, J.; Palmer, C.; Numann, R. Human stem cell-derived cardiomyocytes detect drug-mediated changes in action potentials and ion currents. *J Pharmacol Toxicol Methods* **2014**, *70* (3), 255-267. DOI: 10.1016/j.vascn.2014.09.005.
